# Supplementary material for: The first in situ organosulfonate-templated 3-fold interpenetrating framework built from rare tetrahedral [Cu4(μ4-SO4)] SBUs
Source: Royal Society of Chemistry journal article supplement (doi:10.1039/c1ce05059a), 2011-01-01
Supplement: c1ce05059a.pdf [file c1ce05059a.pdf]

Electronic Supplementary Information for CrystEngComm

This journal is (c) The Royal Society of Chemistry 2011

Electronic Supplementary Information (ESI)

**The first in situ organosulfonate-templated 3-fold  
interpenetrating framework built from rare tetrahedral  
[Cu<sub>4</sub>(μ<sub>4</sub>-SO<sub>4</sub>)] SBUs**

**Zhao-Peng Deng, Zhi-Biao Zhu, Xian-Fa Zhang, Li-Hua Huo,\* Hui Zhao and Shan Gao\***

**Fig. S1.** Views of the channels after interpenetration along the [100], [001] and the [101] directions.

**Fig. S2.** IR spectrum of **1**.

**Fig. S3.** TG curve of **1**.

**Fig. S4.** The PXRD patterns of **1** at different temperatures.

Electronic Supplementary Information for CrystEngComm

This journal is (c) The Royal Society of Chemistry 2011

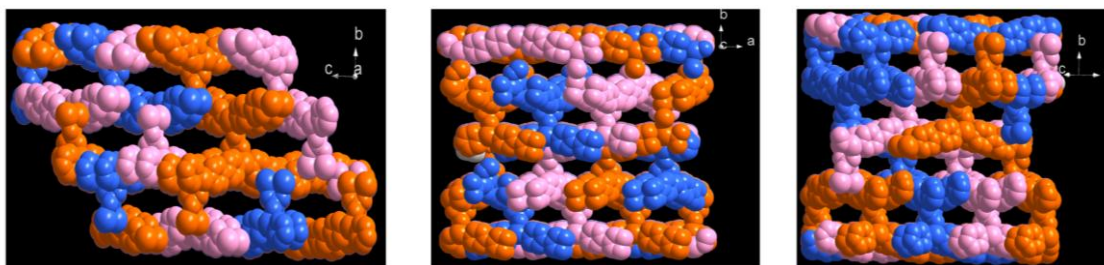

**Fig. S1.** Views of the channels after interpenetration along the [100], [001] and the [101] directions.

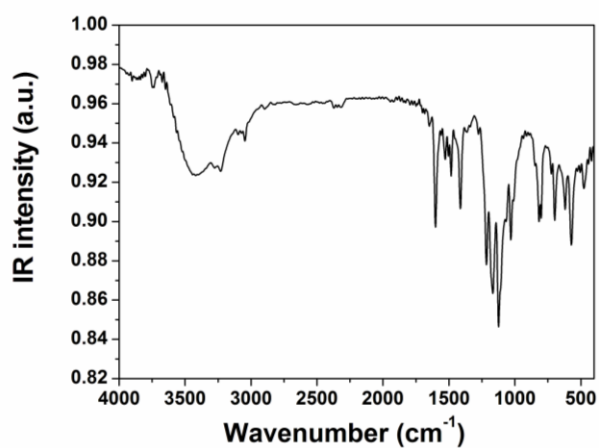

**Fig. S2.** IR spectrum of **1**.

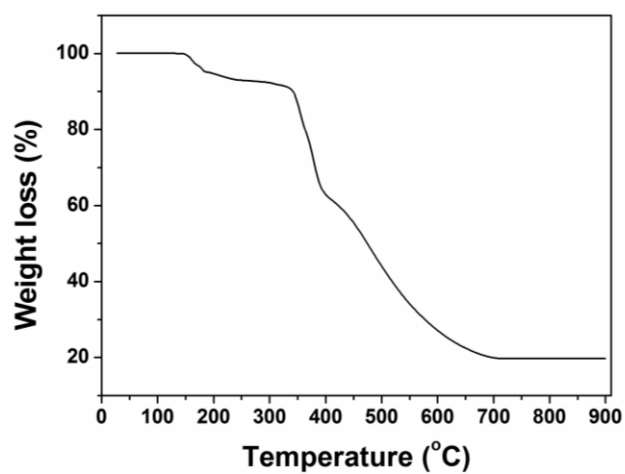

**Fig. S3.** TG curve of **1**.

Electronic Supplementary Information for CrystEngComm

This journal is (c) The Royal Society of Chemistry 2011

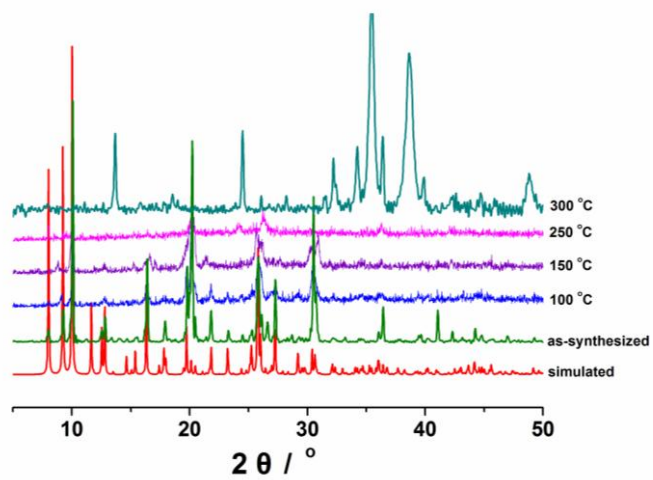

**Fig. S4.** The PXRD patterns of **1** at different temperatures.
